# Supplementary figures and images for: Logistics Trends and Innovations in Response to COVID-19 Pandemic: An Analysis Using Text Mining
Source: MDPI journal article supplement (doi:10.3390/pr10122667), 2022-12-12

term

relative frequency

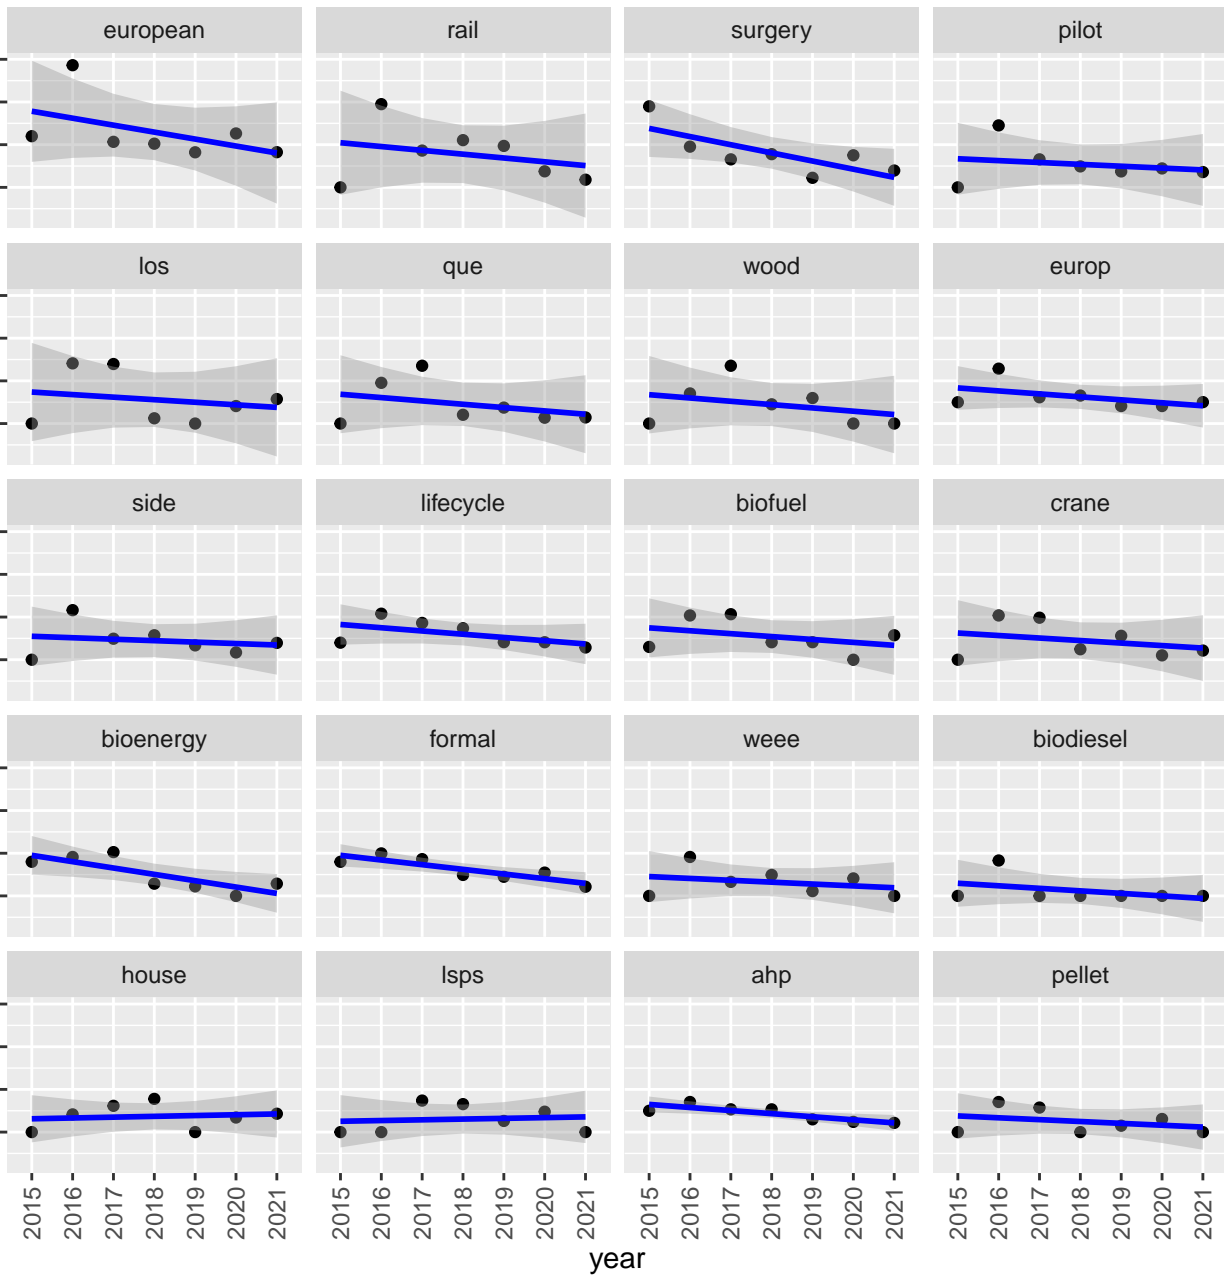

term

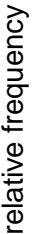

year

term

relative frequency

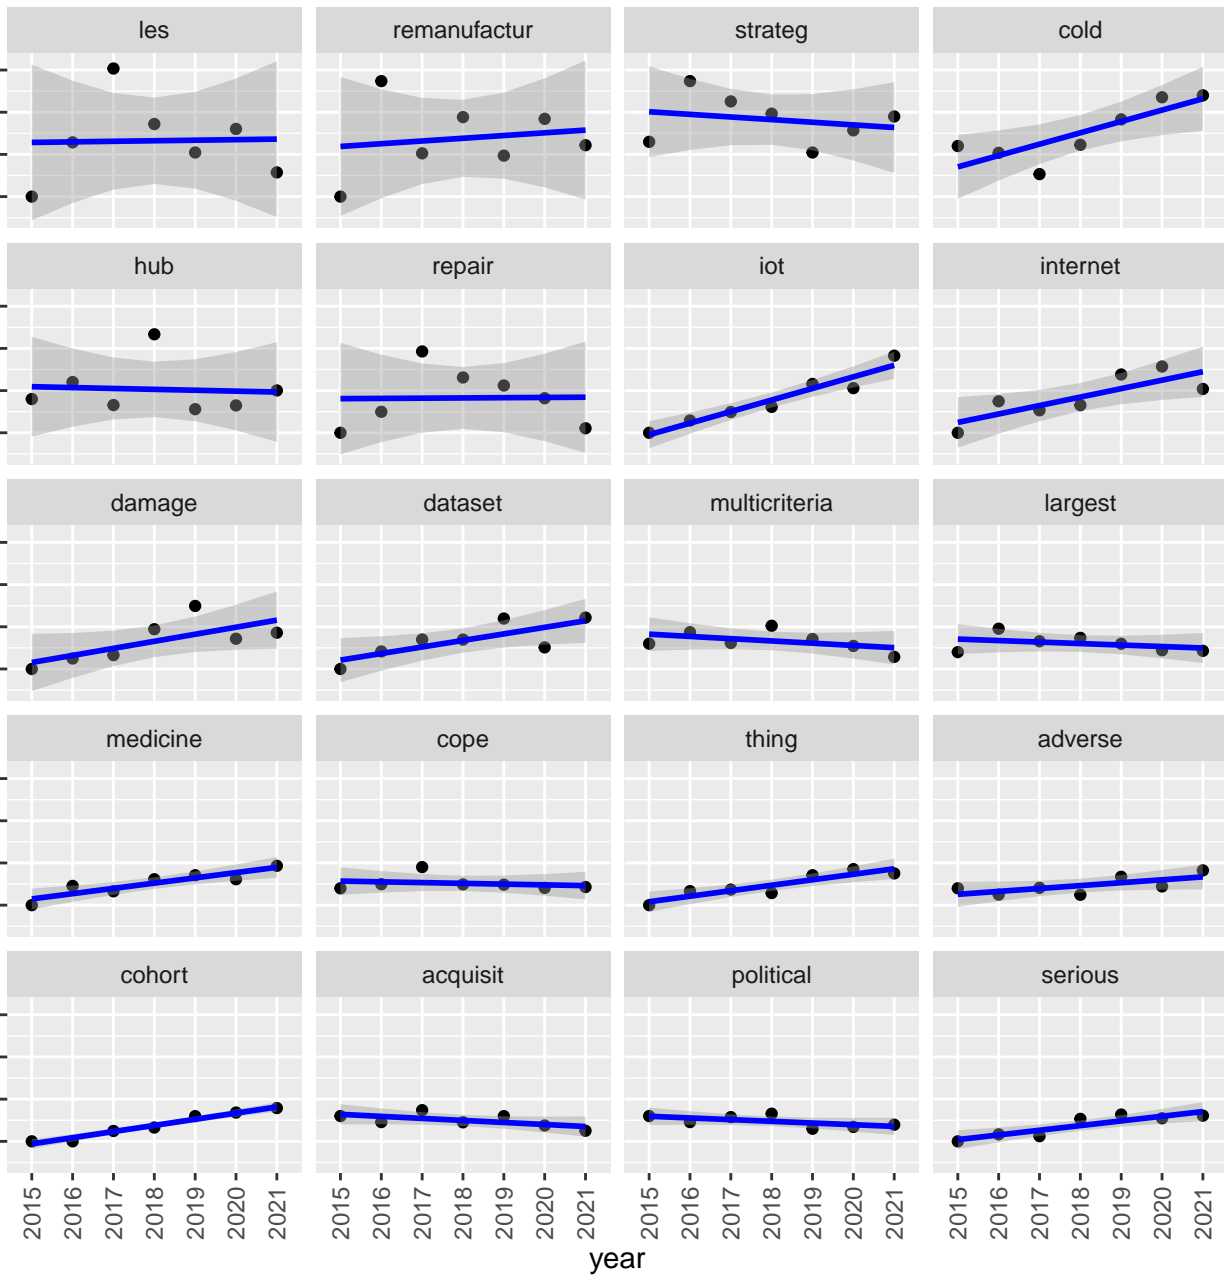

term

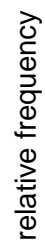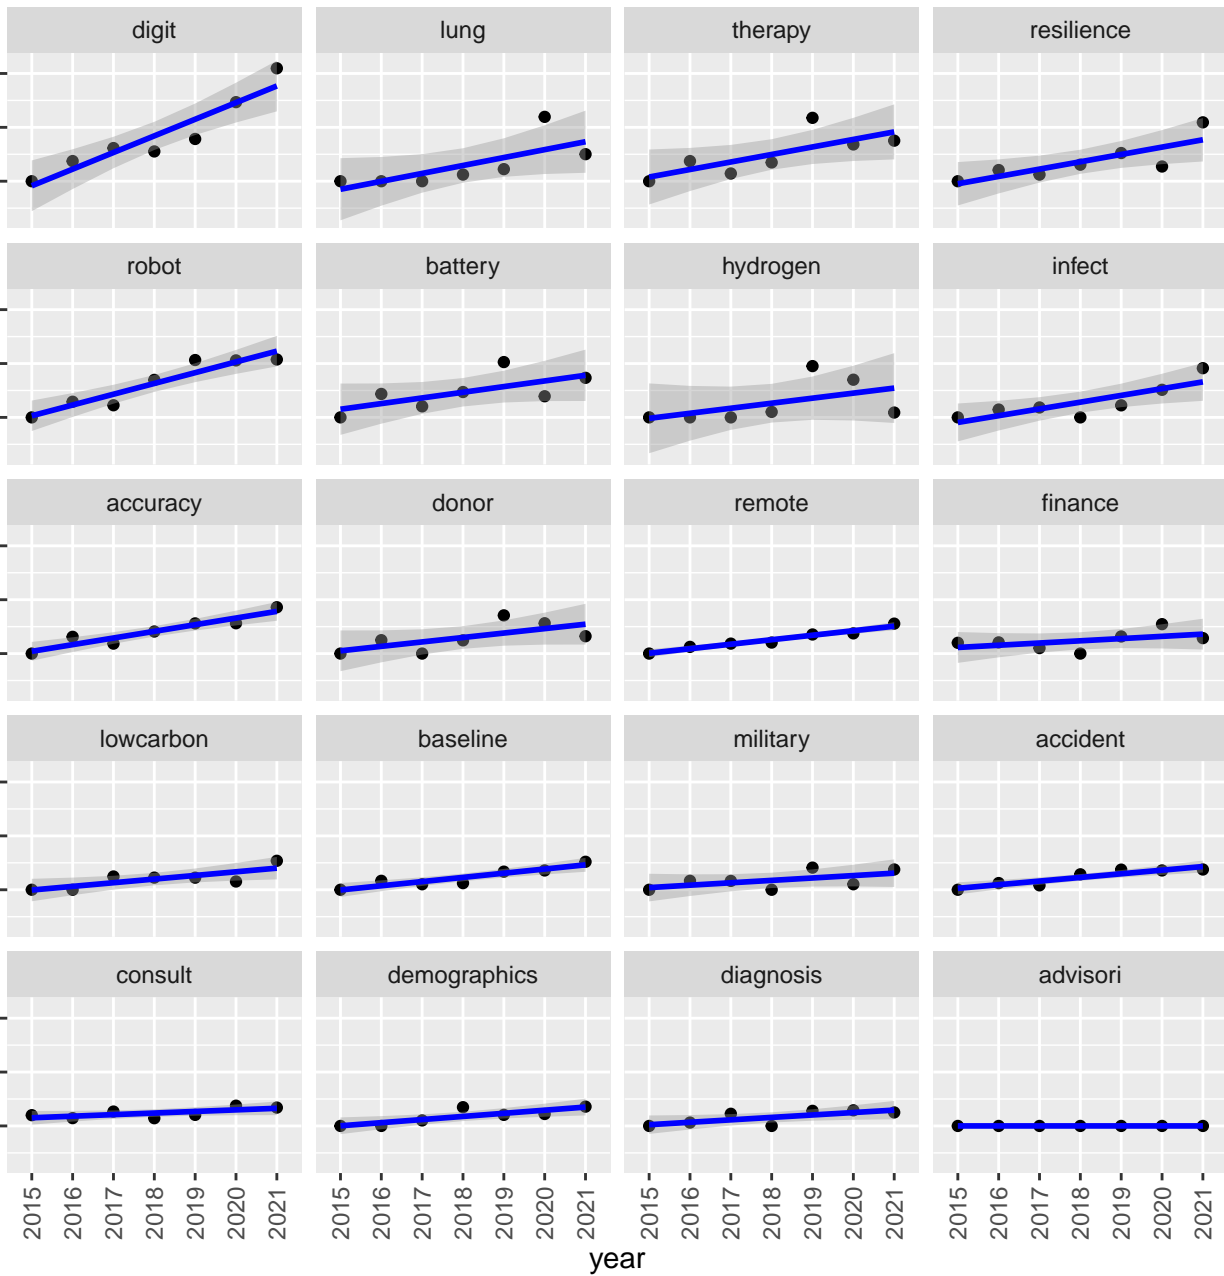

term

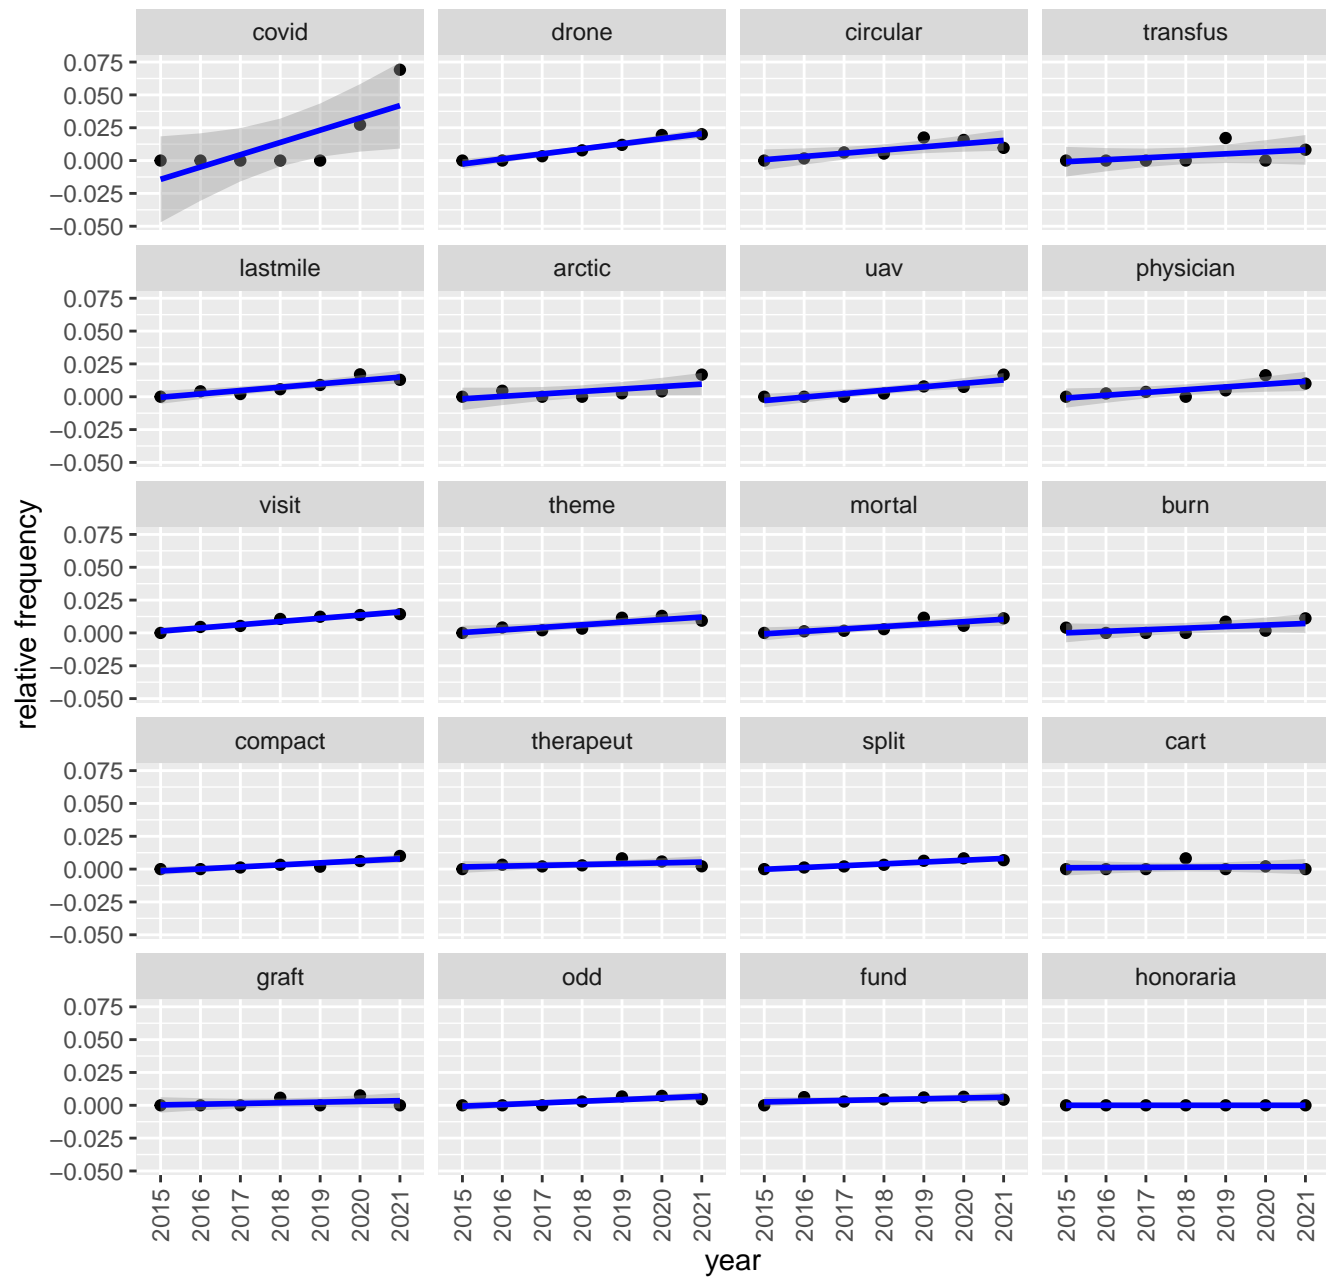

Supplement: s1 [file s1]
